# Supplementary material for: Improved photovoltaic performance of quantum dot-sensitized solar cells using multi-layered semiconductors with the effect of a ZnSe passivation layer
Source: Royal Society of Chemistry journal article supplement (doi:10.1039/c7nj00600d), 2017-01-01
Supplement: c7nj00600d1.pdf [file c7nj00600d1.pdf]

# Supporting Information

## **Improved photovoltaic performance of quantum dot sensitized solar cells using multi layered semiconductors with the effect of ZnSe passivation layer**

Archana Subramanian,<sup>a</sup> Dinah Punnoose,<sup>a</sup> Sunkara Srinivasa Rao,<sup>a</sup> Chebrolu Venkata Thulasi Varma,<sup>a</sup> Bandari Naresh,<sup>a</sup> Vivekanandan Raman,<sup>a</sup> Hee-Je Kim,<sup>a\*</sup>

<sup>a</sup>Department of Electrical and Computer Engineering, Pusan National University, Gumjeong-Gu, Jangjeong-Dong, Busan 609-735, South Korea

\*Corresponding author. Tel: +82 51 510 2364; fax: +82 51 513 0212

E-mail: [heeje@pusan.ac.kr](mailto:heeje@pusan.ac.kr) (Hee-Je Kim)

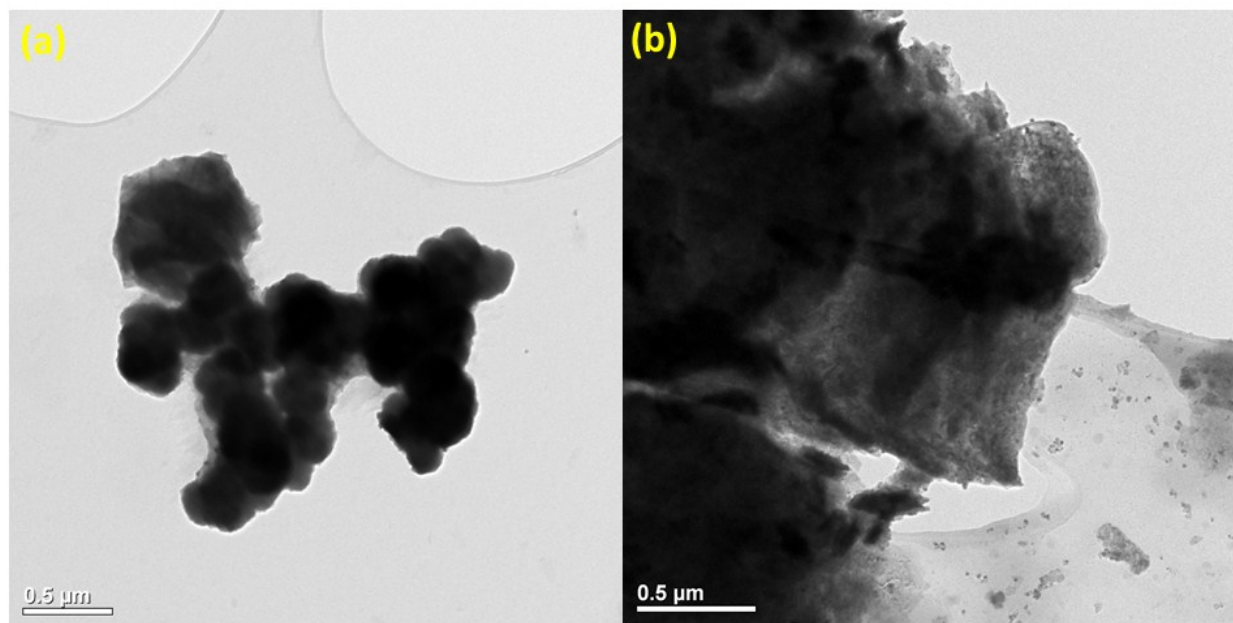

**Fig. S1** TEM images of (a) PbS/CdS/CdSe/ZnS and (b) PbS/CdS/CdSe/ZnSe sensitized TiO<sub>2</sub> film.

From the band gap, the possible electron transfer mechanism in the photo-anode is expected using the previous reports <sup>[1, 2]</sup> and schematically depicted in Fig. S1. The low band gap of bulk PbS shows an inability of electron transfer to the conduction band of the semiconductor photo-anode i.e., the conduction band position of PbS is much lower than that of semiconductor. But in case of PbS quantum confinement the conduction band of PbS tend to an upshift, allowing the fast electron into the semiconductor photo-anode. <sup>[3-5]</sup> Furthermore, the band position of bulk PbS, CdS and CdSe shows a type-I band structure, when the materials were brought into direct contact, the band edges reorganize due to Fermi level alignment and forms a type-II band structure. <sup>[6-8]</sup>

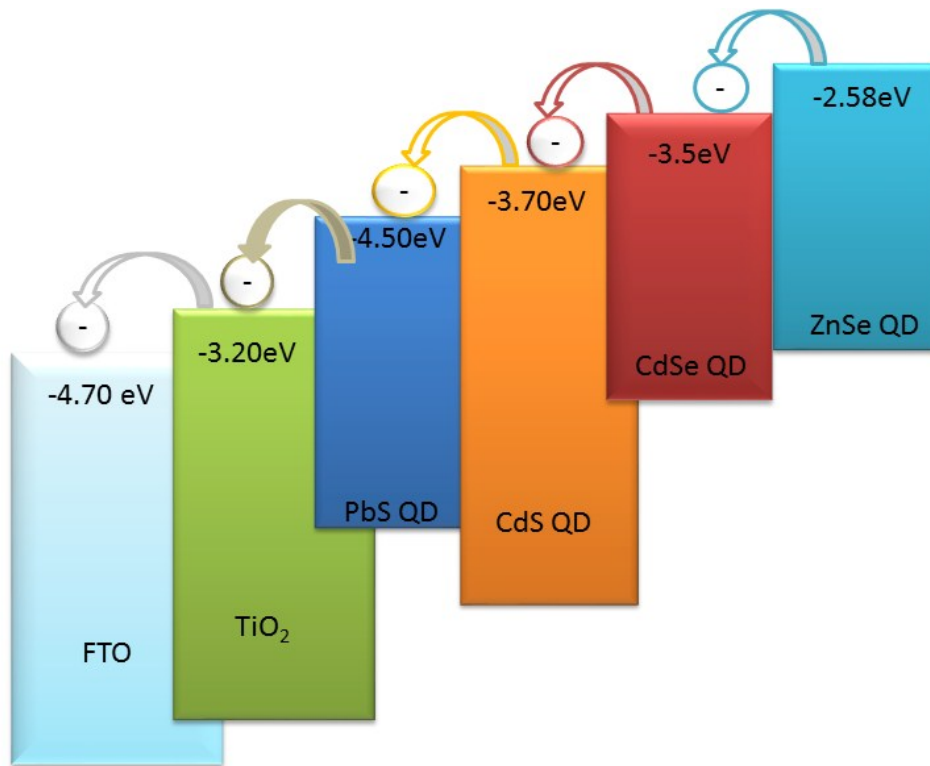

**Fig. S2** Schematic representation of the energy band gap alignment of PbS/CdS/CdSe/ZnSe sensitized TiO<sub>2</sub> films

## References

1. J. Deng, M. Wang, X. Song, Y. Shi, X. Zhang, *J. Colloid interface science*, 2012, **388**, 118-122.
2. J. Jiao, Z.J. Zhou, W.H. Zhou, S.X. Wu, *Material science in semiconductor processing*, 2013, **16**, 435-440.
3. A. Braga, S. Gimenez, I. Concina, A. Vomiero, I.M. Sero, *Journal of physical chemistry letters*, 2011, **2**, 454-460.
4. H. Lee, H.C. Leventis, S.J. Moon, P. Chen, S. Ito, S.A. Haque, T. Torres, F. Neuesch, T. Geiger, S.M. Zakeeruddin, M. Gratzel, M. Nazeerruddin, *Advanced functional materials*, 2009, **19**, 2735-2742
5. I. Robel, M. Kuno, P.V. Kamat, *Journal of American Chemical society*, 2007, **129**, 4136-4137.
6. J.H. Bang, P.V. Kamat, *ACS Nano*, 2011, **5**, 9421-9427.
7. Y.L. Lee, C.F. Chi, S.Y. Liao, *Chemistry of materials*, 2010, **22**, 922-927.
8. M. Seol, H. Kim, W. Kim, Y. Yong, *Electrochemistry communications*, 2010, **12**, 1416-1418.
